1 **Value Certainty in Diffusion Decision Models**

2 Douglas Lee<sup>1</sup> Marius Usher<sup>2</sup>

3 <sup>1</sup> California Institute of Technology, Division of the Humanities and Social Sciences

4 <sup>2</sup> Tel Aviv University, School of Psychological Sciences and Sagol School of Neuroscience

5

6

7

8

9

10

11 E-mail for correspondence:

12 DouglasGLee@gmail.com

13

14 Keywords:

15 Word count:

16

17

18

19

20

21

22

23

## Abstract

24           Decision models such as the drift-diffusion model (DDM) are a widely used and broadly  
25 accepted tool that accounts remarkably well for binary choices and their response time  
26 distributions, as a function of the option values. The DDM is built on an evidence accumulation  
27 to bound concept, where a decision maker repeatedly samples a mental representation of the  
28 values of the options on offer until satisfied that there is enough evidence in favor of one option  
29 over the other. The value estimates that drive the DDM evidence are derived from the relative  
30 strength of value signals that are not stable across time, so that repeated sequential samples are  
31 necessary to average out noise. The standard DDM, however, typically does not allow for  
32 different options to have different levels of variability in their value representations. However,  
33 recent value-based decision studies have shown that a decision maker often reports levels of  
34 certainty regarding value estimates that vary across options. We thus propose that future  
35 versions of DDM should include an option-specific value certainty component. We present four  
36 different versions of such a model and validate them against empirical data from four previous  
37 studies. The data show that a model built around a sort of signal-to-noise ratio for each option  
38 (rather than a pure signal that randomly fluctuates) performs best, accounting for the positive  
39 impact of value certainty on choice consistency and the negative impact of value certainty on  
40 response time.

41

42           The drift-diffusion model (DDM) is ubiquitous in the contemporary literature on decision  
43 making, including research spanning the fields of psychology, neuroscience, economics, and  
44 consumer behavior. The DDM is a parsimonious mechanism that explains normative decisions by  
45 averaging out noise in information processing and implementing an optimal stopping rule  
46 (optimizing response time (RT) for a specified accuracy). This model accounts well for the  
47 dependency of the RT distribution on the values of the choice options, and for the speed-accuracy  
48 tradeoff—the often observed phenomenon that faster choices are typically less accurate (see  
49 Ratcliff et al, 2016; Gold and Shadlen, 2007 for reviews). While initially used in the domain of  
50 perceptual decision-making, the DDM has since become a widespread tool in studies of  
51 preferential (i.e., value-based) decision-making as well (Busemeyer et al, 2019; Tajima,  
52 Drugowitsch, & Pouget, 2016; Polania et al, 2015; Philiastides & Ratcliff, 2013; Milosavljevic et al,  
53 2010; Krajbich, Armel, & Rangel, 2010; Basten et al, 2010). In brief, in its application to  
54 preferential choice, the DDM assumes that the value of each option is represented by a  
55 probability distribution whose mean is the true value of the option, and whose variance  
56 corresponds to processing noise. This noise can be interpreted as imprecision in the value  
57 representations themselves, or as a stochastic distortion of the value signals as they are relayed  
58 through the decision system by populations of neurons (whose firing patterns are known to be  
59 stochastic). Either way, the momentary signal about the relative value of the options (the so-  
60 called evidence for one option over the other) fluctuates randomly around a fixed trajectory (the  
61 so-called drift). In order to average out this processing noise, evidence signals are thought to  
62 accumulate over time until a sufficient amount of evidence has been acquired to allow for a  
63 choice to be made. The DDM thus includes thresholds for each option (typically symmetric) that  
64 trigger a choice once reached by the evidence accumulator. So, the fundamental components of  
65 the drift-diffusion process are the drift rate (the difference in the option values), the diffusion  
66 coefficient (the degree of stochasticity of the system), and the choice boundaries (the minimum  
67 required evidence threshold; see Figure 1).

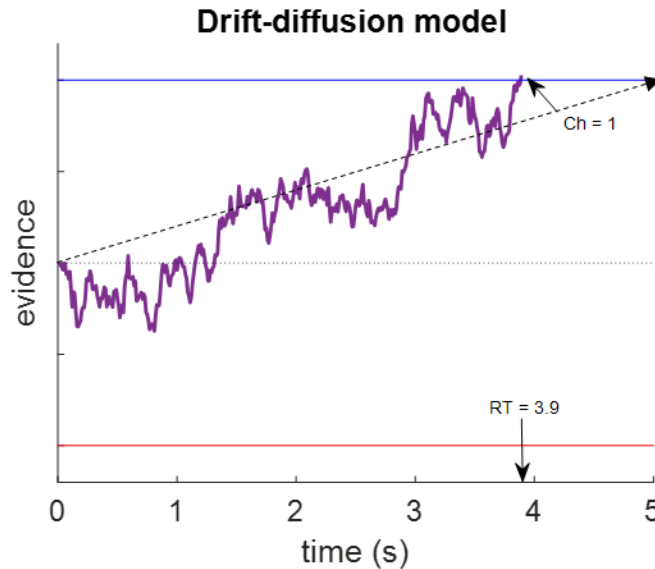

68

69 **Figure 1:** An illustration of the classic basic DDM. Evidence accumulates across time, following a  
70 fixed drift trajectory (black dashed arrow, corresponding to the value difference of choice  
71 options), corrupted by white processing noise. Here, the accumulated evidence reaches the  
72 upper threshold after 3.9 seconds, and a choice for option 1 is recorded.

73 The standard DDM implicitly assumes that processing noise is independent of the identity  
74 of the options contained in a particular choice set. That is to say, there is no option-specific noise  
75 in the DDM (but see Ratcliff, Voskuilen, & Teodorescu, 2018; Teodorescu, Moran, & Usher, 2016  
76 for DDM variants in which the noise increases with task difficulty). Most of the DDM applications  
77 to preference-based decisions have assumed no option-specific noise. Since the brain encodes  
78 not only the subjective value of options, but also the subjective certainty about the value  
79 (Lebreton et al, 2015), it is possible to suggest that the representations of value that the brain  
80 uses to inform the decision process fluctuate, and that the degree of imprecision (or uncertainty)  
81 is not the same for all choice options. Indeed, it has been shown that decision makers hold highly  
82 variable beliefs about the certainty of their value estimates for different options, and that those  
83 beliefs are relatively stable within individuals (Lee & Coricelli, 2020; Lee & Daunizeau, 2020a,  
84 2020b; Gwinn & Krajbich, 2020; Polania, Woodford, & Ruff, 2019). It has further been shown  
85 that the variability in value (un)certainty has a clear impact on both choice and RT (Lee & Coricelli,  
86 2020; Lee & Daunizeau, 2020a, 2020b). Specifically, judged value certainty,  $C$ , correlates

87 positively with choice consistency and negatively with RT (see Figure 2). This provides a  
88 qualitative benchmark that any DDM variant that includes option-specific uncertainty should be  
89 able to account for.

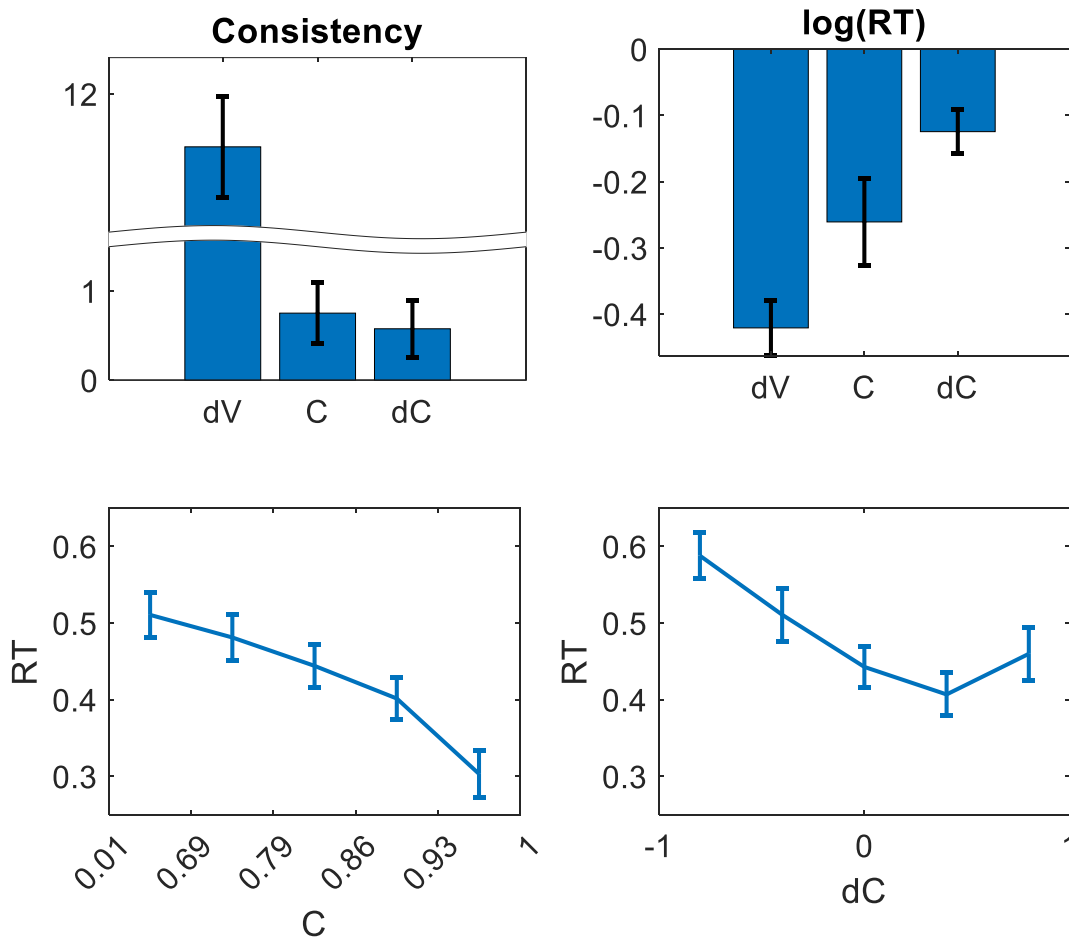

90

91 **Figure 2:** Previous results (pooled across four studies,  $n=152$ ) demonstrate the relationships  
92 between value difference ( $dV$ ), value certainty ( $C = .5(c_1+c_2)$ ), and certainty difference ( $dC = c_1$   
93  $-c_2$ ) with choice consistency and  $\log(RT)$ . Here we show the beta weights from a logistic  
94 regression on choice (upper left) and a linear regression on  $\log(RT)$  (upper right; bar heights  
95 represent population means, error bars represent s.e.m.). Note:  $dV$ ,  $C$ , and  $dC$  were all  
96 simultaneously included as independent variables in each regression model. Lower plots show  
97 the isolated relationships between  $\log(RT)$  and  $C$  (left) and  $C_1 - C_2$  (right). Note: the distribution  
98 of  $C$  was highly skewed, so we show the data binned by quantiles. (Lee & Daunizeau, 2020a,  
99 2020b; Lee & Coricelli, 2020; Gwinn & Krajbich, 2020)

100           As we show below, the most straightforward way to include option-specific noise in the  
101 preferential DDM – by assuming that noise increases with value uncertainty – leads to the wrong  
102 qualitative predictions, with regards to the RT x certainty benchmark. In particular, as certainty  
103 increases, noise decreases, resulting in lower RT. Thus, unlike what we see in experimental data,  
104 such a model would predict that people would speed up when they are less certain of the options'  
105 values (all else equal). Moreover, this prediction is not specific to the standard DDM, but applies  
106 to the broader class of evidence accumulation-to-bound models (e.g., independent accumulators  
107 (Vickers, 1970; Brown & Heathcote, 2006); leaky competing accumulator (LCA; Usher &  
108 McLelland, 2001)), which also predict that higher noise in the system will result in *faster*  
109 responses, in direct contrast to the empirical data.

110           The aim of this paper is to examine a number of DDM variants, which could potentially  
111 rise to the challenge of accounting for the impact of value certainty on choice and RT in behavioral  
112 data. In particular, we will first present a variety of derivations of the standard DDM, each of  
113 which incorporates the concept of option-specific value certainty in a unique and realistic way,  
114 starting from the default DDM that has no option-specific noise, and progressing to signal-to-  
115 noise type of models. We then fit each of these models to experimental data from a variety of  
116 empirical datasets. Finally, we quantitatively compare the performance of each model across  
117 the different datasets and suggest the best recommended approach for future studies to  
118 incorporate option-specific value certainty in models derived from the DDM. To anticipate our  
119 results, we find that a signal-to-noise DDM variant provides the best fit to the data and accounts  
120 for all qualitative benchmarks.

## 121 **METHODS**

### 122 ***Computational models***

123           In each of the models described below, we consider decisions between two alternatives,  
124 with values,  $v_1$  and  $v_2$ , and with uncertainties,  $\sigma_1$ ,  $\sigma_2$ , respectively. Evidence of these values is  
125 integrated over deliberation time, subject to noise. The evidence accumulator for each decision  
126 is initialized at a neutral starting point (i.e., zero evidence or default bias in favor of either option),  
127 and evolves until reaching one of two symmetric boundaries (see Figure 1 above). For each

128 decision, the output of the model is: which boundary is reached, or the choice ( $ch = \{0, 1\}$ ) and  
129 the number of integration time steps elapsed when that boundary is reached (RT).

### 130 *Model 1*

131 As a baseline default model for comparison (without any option-specific certainty term),  
132 we first consider the classic basic DDM. In this model, the equations that govern the evidence  
133 accumulation process are:

$$134 \quad E_{t+1} = E_t + d\Delta$$

$$135 \quad \Delta \sim N(\mu_1 - \mu_2, \sigma^2)$$

136 where E represents the cumulative balance of evidence that one option is better than the other,  
137 t represents deliberation time,  $\Delta$  represents the incremental evidence in favor of one option over  
138 the other, d is a scalar,  $\mu_i$  is the value estimate of option i, and  $\sigma^2$  represents processing noise in  
139 the evidence accumulation and/or comparator systems. In a standard basic DDM, choice  
140 probability and expected response time can be analytically calculated using the following  
141 equations (Alos-Ferrer, 2018):

$$142 \quad p(ch = 1) = \frac{1}{1 + e^{\left(\frac{-2\theta d}{\sigma^2}(\mu_1 - \mu_2)\right)}}$$

$$143 \quad RT = \frac{\theta(2 * p(ch = 1) - 1)}{d(\mu_1 - \mu_2)}$$

144 where  $\theta$  is the height of the evidence accumulation threshold where a decision is triggered  
145 (shown here as the upper threshold, for a choice of option 1),  $p(ch=1)$  is the probability that the  
146 upper threshold will be reached (rather than the lower threshold), and RT is the expected time  
147 at which the accumulation process will end (by reaching one of the thresholds)<sup>1</sup>. Because this  
148 system of equations is over-parameterized, one of the free parameters must be fixed for a

---

<sup>1</sup> In the standard version of the DDM, the RT distribution for correct and incorrect responses is identical. In a more complex version, additional variability parameters are introduced that allow to account for asymmetries between the RT distributions of correct and incorrect responses (see Ratcliff & McKoon, 2008 for review). We only consider the standard DDM without the variability parameters, as those cannot change the impact of value certainty on accuracy and RT illustrated in Figures 2 and 3.

149 practical application of the equations. In this work, we will fix the threshold  $\theta$  to a value of 1  
 150 when fitting the models, for simplicity. Choice probability and RT will thus be functions of the  
 151 drift rate  $d$  and the noise  $\sigma^2$  (see Figure 3). As expected, accuracy increases and RT decreases with  
 152 the drift. The noise, on the other hand, reduces both accuracy and RT.

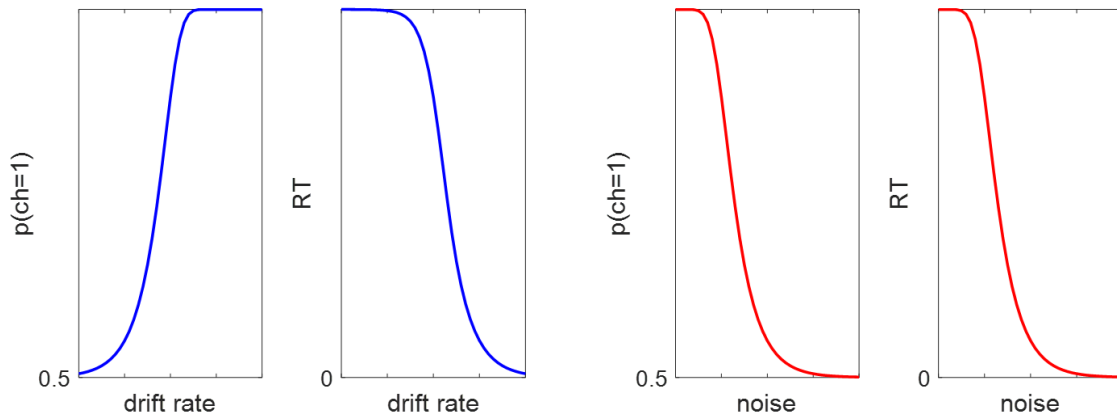

153  
 154 **Figure 3:** With all other parameters fixed, an increase in drift rate leads to a sigmoidal increase  
 155 in the probability of choosing option 1 from 0.5 (random guess) to 1, and a sigmoidal decrease  
 156 in RT (left plots in blue). With all other parameters fixed, an increase in processing noise will  
 157 lead to a sigmoidal decrease in the probability of choosing option 1, and a parallel sigmoidal  
 158 decrease in RT (right plots in red).

159 *Model 2*

160 The simplest and most obvious solution to incorporate option-specific uncertainty into  
 161 the DDM would be to model the process as:

$$E_{t+1} = E_t + d\Delta$$

$$\Delta \sim N(\mu_1 - \mu_2, \sigma^2 + \sigma_1^2 + \sigma_2^2)$$

164 which is simply the standard DDM equation capturing the evolution of the accumulated evidence  
 165 across time, but with  $\sigma_i^2$  representing the uncertainty about the value estimate of option  $i$ . The  
 166 only difference between this formulation and the standard one is that here the variance of  $\Delta$  is  
 167 specific to the options in the current choice set, whereas in the standard DDM it is fixed across  
 168 choices (for an individual decision maker). A direct result of this reformulation is that choices



169 between options with greater value uncertainty (lower C) will be more stochastic and take less  
170 time (on average), as can be seen by examining the (revised) DDM equations for choice  
171 probability and expected response time (see also Fig 3, red lines):

$$172 \quad p(ch = 1) = \frac{1}{1 + e^{\left(\frac{-2\theta d(\mu_1 - \mu_2)}{\sigma^2 + \sigma_1^2 + \sigma_2^2}\right)}}$$

$$173 \quad RT = \frac{\theta(2 * p(ch = 1) - 1)}{d(\mu_1 - \mu_2)}$$

### 174 *Model 3*

175 An alternative way in which the concept of option-specific value (un)certainty could be  
176 incorporated into the DDM would be through a signal-to-noise dependency in the drift rate. The  
177 drift rate in the DDM symbolizes the accumulation of evidence for one option over the other,  
178 equal to the value estimate of one option minus the value estimate of the other option (scaled  
179 by a fixed term). The accumulator variable is referred to as “evidence” because the probability  
180 distributions controlling it (or the neural activity driving it) are thought to provide reliable signal  
181 that will accurately inform the decision. If the value representations of different options can have  
182 different levels of uncertainty, it stands to reason that the reliability of the “evidence” that these  
183 signals provide about the correct decision will also be different. As such, evidence drawn from a  
184 more reliable source (i.e., one with higher certainty) should be weighted more heavily. Under  
185 this framework, the equation governing the DDM process would be:

$$186 \quad E_{t+1} = E_t + d\Delta$$

$$187 \quad \Delta \sim N\left(\frac{\mu_1 - \mu_2}{\sqrt{\sigma_1^2 + \sigma_2^2}}, \sigma^2\right)$$

188 where  $\sigma^2$  (without a subscript) is the noise in the system unrelated to specific choice options. The  
189 only difference between this formulation and the standard one is that here the mean of the  
190 option value difference is divided by its standard deviation. A direct result of this reformulation  
191 is that choices between options with greater value uncertainty will be more stochastic and also  
192 take *more* time (on average), as can be seen by examining the (revised) DDM equations for choice  
193 probability and expected response time:

194 
$$p(ch = 1) = \frac{1}{1 + e^{\left(\frac{-2\theta d(\mu_1 - \mu_2)}{\sigma^2(\sqrt{\sigma_1^2 + \sigma_2^2})}\right)}}$$

195 
$$RT = \frac{\theta(2 * p(ch = 1) - 1)}{\frac{d(\mu_1 - \mu_2)}{\sqrt{\sigma_1^2 + \sigma_2^2}}}$$

196 Here the impact of option-specific uncertainty on RT is more complex. First, greater  
 197 uncertainty decreases RT through its effect on choice stochasticity (as before). Second, greater  
 198 uncertainty directly increases RT by diminishing the slope of the drift rate. The second effect  
 199 dominates.

200 *Model 4*

201 A variant of the DDM in which the drift rate is altered by the option-specific value  
 202 certainty could be one in which the evidence in favor of each option is scaled by its own precision  
 203 term, as is the case, for example, in multi-sensory integration (Drugowitsch et al, 2014; Fetsch et  
 204 al, 2012). The drift rate would thus become the accumulation of adjusted evidence for one option  
 205 over the other, equal to the precision-weighted value estimate of one option minus the precision-  
 206 weighted value estimate of the other option (scaled by a fixed term). Here, the evidence drawn  
 207 from a more reliable source (i.e., one with higher certainty) will be weighted more heavily (as in  
 208 Model 3), but prior to comparison between the alternative options. Note that here the certainty  
 209 weighting is truly specific to each option, whereas in Model 3 the certainty weighting is specific  
 210 to the pair of options. Under this framework, the equation governing the DDM process would be:

211 
$$E_{t+1} = E_t + d\Delta$$

212 
$$\Delta \sim N\left(\frac{\mu_1}{\sqrt{\sigma_1^2}} - \frac{\mu_2}{\sqrt{\sigma_2^2}}, \sigma^2\right)$$

213 The only difference between this formulation and the standard one is that here the mean  
 214 of the option value difference is adjusted by the standard deviations of the individual choice  
 215 options. Because the evidence in favor of each option (prior to comparison) will be scaled by its  
 216 own specific (and importantly, potentially different) precision term, the impact on both choice

217 stochasticity and response time could go in either direction. This can be seen by examining the  
218 (revised) DDM equations for choice probability and expected response time:

219

$$p(ch = 1) = \frac{1}{1 + e^{\left( \frac{-2\theta d}{\sigma^2} \left( \frac{\mu_1}{\sqrt{\sigma_1^2}} - \frac{\mu_2}{\sqrt{\sigma_2^2}} \right) \right)}}$$

220

$$RT = \frac{\theta(2 * p(ch = 1) - 1)}{d \left( \frac{\mu_1}{\sqrt{\sigma_1^2}} - \frac{\mu_2}{\sqrt{\sigma_2^2}} \right)}$$

221 Here the impact of option-specific uncertainty on both choice and RT is more complex  
222 than in the other models presented above. If the evidence stream for one option has both a  
223 larger mean and a smaller variance, relative to the other option, the effective drift rate will be  
224 higher than in a standard DDM (e.g., choices will be less stochastic and faster). On the other  
225 hand, if the option with the larger mean evidence stream is different from the option with the  
226 more reliable evidence stream, the effective drift rate will be lower than in a standard DDM (e.g.,  
227 choices will be more stochastic and slower).

#### 228 *Model 5*

229 Yet another alternative way in which the DDM could include option-specific value  
230 certainty is in the form of an independent evidence accumulator -- a secondary drift, with a rate  
231 proportional to the difference in certainty between the choice options. In this way, the decision  
232 about which option to choose would be influenced both by which value estimate was higher (via  
233 the primary, standard drift) and by which value estimate was more certain (via the secondary,  
234 novel drift). The secondary drift might represent an aversion to risk or ambiguity, where the  
235 deliberation process would be both slowed by the risk/ambiguity and pulled towards the more  
236 certain option. This would imply that the decision maker prefers options that are more valuable,  
237 but also options for which the value is more certain. Under this framework, the equation  
238 governing the DDM process would be:

239

$$E_{t+1} = E_t + d_v \Delta_v + d_c \Delta_c$$

240 
$$\Delta_v \sim N(\mu_1 - \mu_2, \sigma^2)$$

241 
$$\Delta_c \sim N(\sigma_1^2 - \sigma_2^2, \sigma^2)$$

242 where  $\Delta_v$  and  $\Delta_c$  are the incremental evidence for value and certainty, respectively, and  $d_v$  and  $d_c$   
243 are scalars (it is assumed that  $d_v$  will always be positive, but  $d_c$  could take either sign). The  
244 inclusion of a secondary drift rate (in essence, a parallel evidence stream that monitors value  
245 certainty rather than value itself) can have either a positive or a negative impact on both choice  
246 and RT, depending on whether the option with the higher mean evidence stream is the same as  
247 or different than the option with the higher evidence reliability (as well as on the sign of  $d_c$ ). This  
248 can be seen by examining the (revised) DDM equations for choice probability and expected  
249 response time:

250 
$$p(ch = 1) = \frac{1}{1 + e^{\left(\frac{-2\theta}{\sigma^2}[d_v(\mu_1 - \mu_2) + d_c(\sigma_1^2 - \sigma_2^2)]\right)}}$$

251 
$$RT = \frac{\theta(2 * p(ch = 1) - 1)}{d_v(\mu_1 - \mu_2) + d_c(\sigma_1^2 - \sigma_2^2)}$$

252 Here, the secondary drift rate will result in more consistent and faster choices if the sign  
253 of  $\mu_1 - \mu_2$  is the same as that of  $\sigma_1^2 - \sigma_2^2$ , but it will result in less consistent and slower choices  
254 otherwise. This, of course, is under the assumption that the decision maker is risk/ambiguity  
255 averse (i.e.,  $d_c > 0$ ). If the decision maker were risk/ambiguity seeking (i.e.,  $d_c < 0$ ), the opposite  
256 predictions would hold.

## 257 **Materials and Design**

258 Using a variety of different datasets from previous studies, one at a time, we fit  
259 experimental data to each of the models that we described above. We then performed Bayesian  
260 model comparison to determine which of the models (if any) performed better than the others  
261 across the population of participants. For this model fitting and comparison exercise, we relied  
262 on the Variational Bayesian Analysis toolbox (VBA, available freely at [https://mbb-  
263 team.github.io/VBA-toolbox/](https://mbb-team.github.io/VBA-toolbox/); Daunizeau, Adam, & Rigoux, 2014) for Matlab R2020a. We used  
264 the VBA\_NLStateSpaceModel function to fit the data for each participant individually, followed  
265 by the VBA\_groupBMC function to compare the results of the model fitting across models for the

266 full group of participants. The input for the model inversion was a series of two-alternative forced  
267 choice (2AFC) data, including measures of value estimate and value estimate certainty for each  
268 choice option, the chosen option (left or right) for each trial, and response time (RT) for each  
269 trial. Some datasets also included choice confidence reports for each trial, which were included  
270 in supplementary analyses as will be described below. The parameters to be fitted included all  
271 of the  $d$  and  $\sigma^2$  terms described above, plus additional parameters for an affine transformation  
272 of experimental certainty measures into theoretical ones. This is necessary because in the  
273 experimental data, the measures of value and those of value certainty reside on the same scale,  
274 but this is likely untrue for the cognitive variables that are meant to drive the models.

#### 275 *Dataset 1*

276 The first dataset we examined was from Lee & Daunizeau (2020a). In this study,  
277 participants made choices between various snack food options based on their personal subjective  
278 preferences. Value estimates for each option were provided in a separate rating task prior to the  
279 choice task. Participants used a slider scale to respond to the question, “Does this please you?”  
280 After each rating, participants used a separate slider scale to respond to the question, “Are you  
281 sure?” This provided a measure of value estimate certainty for each item. During the choice  
282 task, participants were presented with pairs of snack food images and asked, “What do you  
283 prefer?” After each choice, participants used a slider scale to respond to the question, “Are you  
284 sure about your choice?” to provide a subjective report of choice confidence. This dataset  
285 contained 51 subjects, each of whom were faced with 54 choice trials.

#### 286 *Dataset 2*

287 The second dataset we examined was from Lee & Daunizeau (2020b). In this study,  
288 participants made choices between various snack food options based on their personal subjective  
289 preferences. Value estimates for each option were provided in a separate rating task prior to the  
290 choice task. Participants used a slider scale to respond to the question, “How much do you like  
291 this item?” After each rating, participants used the same slider scale to respond to the question,  
292 “How certain are you about the item’s value?” by indicating a zone in which they believed the  
293 value of the item surely fell. This provided a measure of value estimate certainty for each item.

294 During the choice task, participants were presented with pairs of snack food images and asked,  
295 “Which do you prefer?” After each choice, participants used a slider scale to respond to the  
296 question, “Are you sure about your choice?” to provide a subjective report of choice confidence.  
297 This dataset contained 32 subjects, each of whom were faced with 74 choice trials.

### 298 *Dataset 3*

299 The third dataset we examined was from Lee & Coricelli (2020). In this study, participants  
300 made choices between various snack food options based on their personal subjective  
301 preferences. Value estimates for each option were provided in a separate rating task prior to the  
302 choice task. Participants used a slider scale to respond to the question, “How pleased would you  
303 be to eat this?” After each rating, participants used a six-point descriptive scale to respond to  
304 the question, “How sure are you about that?” This provided a measure of value estimate  
305 certainty for each item. During the choice task, participants were presented with pairs of snack  
306 food images and asked, “Which would you prefer to eat?” After each choice, participants used a  
307 slider scale to respond to the question, “How sure are you about your choice?” to provide a  
308 subjective report of choice confidence. This dataset contained 47 subjects, each of whom were  
309 faced with 55 choice trials.

### 310 *Dataset 4*

311 The fourth dataset we examined was from Gwinn & Krajbich (2020). In this study,  
312 participants made choices between various snack food options based on their personal subjective  
313 preferences. Value estimates for each option were provided in a separate rating task prior to the  
314 choice task. Participants used a 10-point numerical scale to respond to the prompt, “Please  
315 indicate how much you want to eat this item.” After each rating, participants used a seven-point  
316 numerical scale to respond to the prompt, “Please indicate how confident you are in your rating  
317 of this item.” This provided a measure of value estimate certainty for each item. During the  
318 choice task, participants were presented with pairs of snack food images and instructed to choose  
319 the one that they preferred to eat. Choice confidence was not measured in this study. This  
320 dataset contained 36 subjects, each of whom were faced with 200 choice trials.

321

322 **RESULTS**

323 ***Model comparison***

324 Before we present the quantitative model comparison results, we first show the  
325 qualitative predictions that each model (fitted to its optimal parameters) makes with respect to  
326 the effects of value difference, value certainty, and certainty difference on choice consistency,  
327 RT, and choice confidence (see Figure 4). We first simulated  $10^7$  trials for each model, based on  
328 random input values with similar distributions as in our experimental data. The model-  
329 parameters we used were in line with the best fit parameters to the experimental data. We then  
330 performed GLM regressions: dV, C, and dC on choice (binomial) and on RT (linear). (Note: we  
331 coded the data such that option 1 always had the higher value.) A preliminary inspection of the  
332 results suggests that Model 4 is the only model that accounts for all of the qualitative benchmarks  
333 of the certainty-RT correlations, in particular the decrease in RT with both average certainty and  
334 certainty difference. As expected, Model 2 makes the wrong qualitative prediction (higher RT  
335 with value certainty), while Model 3 and Model 5 fail to account for the dependency of RT on  
336 either certainty difference (dC) or average certainty (C), respectively.

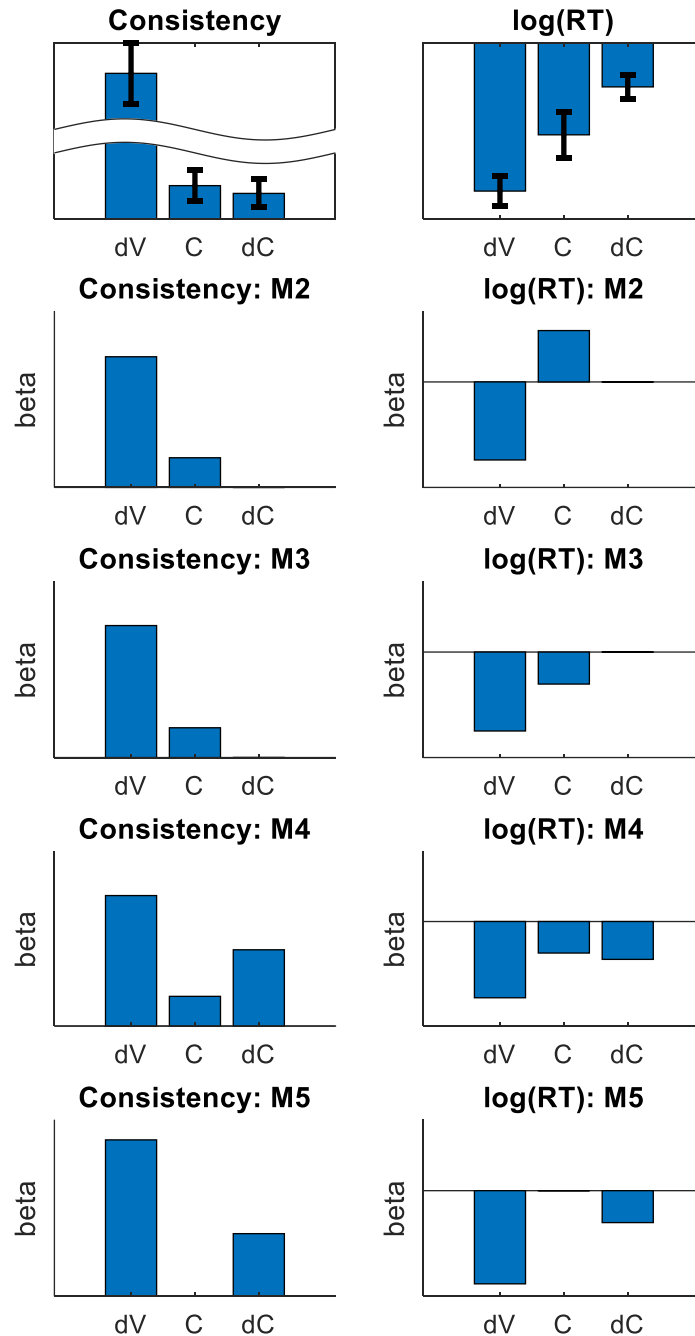

337

338 **Figure 4:** Qualitative predictions of the effects of value difference, value certainty, and  
339 certainty difference on choice consistency and RT (shown for models 2-5; top row shows  
340 experimental data). (Bar heights represent mean GLM beta weights based on  $10^7$  simulated  
341 trials for each model.)



342 The classic basic DDM, our Model 1, has been validated countless times for its ability to  
343 account for two-alternative forced choice responses and mean response times. The other models  
344 we described above, Models 2-5, are new and have therefore never been tested with empirical  
345 data. Thus, we start our model comparison exercise with one-on-one competitions between  
346 Model 1 and each of Models 2-5, separately. This serves as a simple test of whether the addition  
347 of the option-specific value estimate certainty term, as suggested in each of the four different  
348 manners described in Models 2-5, improves the fit of the classic DDM. We then perform a  
349 comparison across all five models simultaneously, and test whether any of them dominates the  
350 others in terms of best fit to the data. We present the quantitative results of the model-fit  
351 comparison in Figure 5, and describe them below.

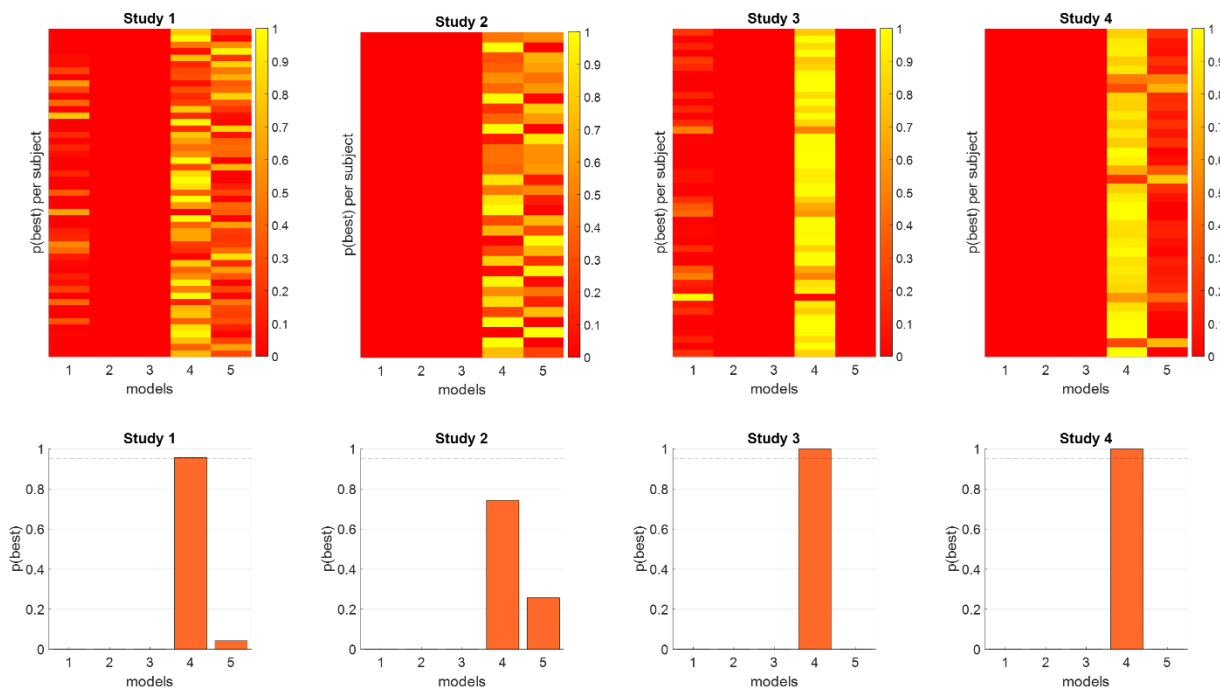

352

353 **Figure 5:** Model comparison results. For the five models we examined, we show here the  
354 model attributions (top row) for each of the studies we examined, at the subject level; each cell  
355 represents the probability that the model (column) best represents the behavior of the subject  
356 (row). We also show the exceedance probability for each model being the best in each study  
357 (bottom row).

358 For Dataset 1, Model 1 dominated Model 2, with an exceedance probability of 1 and an  
359 estimated model frequency (across the participant population) of 0.972. Model 1 dominated  
360 Model 3, with an exceedance probability of 1 and an estimated model frequency of 0.990. Model  
361 4 dominated Model 1, with an exceedance probability of 1 and an estimated model frequency of  
362 0.779. Model 5 dominated Model 1, with an exceedance probability of 1 and an estimated model  
363 frequency of 0.757. When comparing all models simultaneously, Model 4 dominated, with an  
364 exceedance probability of 0.956 and an estimated model frequency of 0.541. Models 1, 2, 3, and  
365 5 had estimated model frequencies of 0.127, 0.004, 0.004, and 0.324, respectively. Because  
366 Models 4 and 5 each performed better than Model 1, we ran the comparison again including  
367 Model 6, which was a combination of Models 4 and 5. Model 4 again dominated, with Model 6  
368 receiving no support.

369 For Dataset 2, Model 1 dominated Model 2, with an exceedance probability of 1 and an  
370 estimated model frequency of 0.984. Model 1 dominated Model 3, with an exceedance  
371 probability of 1 and an estimated model frequency of 0.983. Model 4 dominated Model 1, with  
372 an exceedance probability of 1 and an estimated model frequency of 0.897. Model 5 dominated  
373 Model 1, with an exceedance probability of 1 and an estimated model frequency of 0.889. When  
374 comparing all models simultaneously, Model 4 outperformed the others, with an exceedance  
375 probability of 0.742 and an estimated model frequency of 0.546. Models 1, 2, 3, and 5 had  
376 estimated model frequencies of 0.127, 0.004, 0.004, and 0.324, respectively. Because Models 4  
377 and 5 each performed better than Model 1, we ran the comparison again including Model 6,  
378 which was a combination of Models 4 and 5. Model 4 again outperformed the others, with Model  
379 6 receiving no support.

380 For Dataset 3, Model 1 dominated Model 2, with an exceedance probability of 1 and an  
381 estimated model frequency of 0.987. Model 1 dominated Model 3, with an exceedance  
382 probability of 1 and an estimated model frequency of 0.985. Model 4 dominated Model 1, with  
383 an exceedance probability of 1 and an estimated model frequency of 0.860. Model 5 slightly  
384 outperformed Model 1, with an exceedance probability of 0.561 and an estimated model  
385 frequency of 0.511. When comparing all models simultaneously, Model 4 dominated, with an  
386 exceedance probability of 1 and an estimated model frequency of 0.865. Models 1, 2, 3, and 5

387 had estimated model frequencies of 0.122, 0.004, 0.004, and 0.004, respectively. Because  
388 Models 4 and 5 each performed better than Model 1, we ran the comparison again including  
389 Model 6, which was a combination of Models 4 and 5. Model 4 again dominated, with Model 6  
390 receiving no support.

391 For Dataset 4, Model 1 dominated Model 2, with an exceedance probability of 1 and an  
392 estimated model frequency of 0.955. Model 1 dominated Model 3, with an exceedance  
393 probability of 1 and an estimated model frequency 0.982. Model 4 dominated Model 1, with an  
394 exceedance probability of 1 and an estimated model frequency of 0.986. Model 5 dominated  
395 Model 1, with an exceedance probability of 1 and an estimated model frequency of 0.986. When  
396 comparing all models simultaneously, Model 4 dominated, with an exceedance probability of 1  
397 and an estimated model frequency of 0.808. Models 1, 2, 3, and 5 had estimated model  
398 frequencies of 0.005, 0.005, 0.005, and 0.175, respectively. Because Models 4 and 5 each  
399 performed better than Model 1, we ran the comparison again including Model 6, which was a  
400 combination of Models 4 and 5. Model 4 again dominated, with Model 6 receiving no support.

401

## 402 **DISCUSSION**

403 The aim of this study was to examine a number of variants of drift-diffusion model for  
404 preferential choice, and to probe them in their ability to account for benchmark data on the  
405 dependency of choice and RT on value uncertainty. As illustrated in Figure 2, the experimental  
406 data that we examined show that value certainty has a clear impact on both choice and RT (thus  
407 extending beyond the default DDM without option-specific noise), and also provides strong  
408 constraints on the way one can introduce option-specific noise into the model. As we have  
409 shown, the simplest DDM extension, in which the noise increases with value uncertainty,  
410 produces the wrong qualitative prediction: RT increases with certainty (certainty reduces the  
411 noise in the system, which slows down RT; see Figure 3, right panel). Moreover, this problem  
412 with the introduction of option-specific value uncertainty in modeling value-based decisions is  
413 not particular to the DDM, but also applies to the broader class of evidence accumulation-to-  
414 bound models, in which noise speeds up RT.

415           We have examined and tested three additional DDM variants. The first two (Models 3-4)  
416 were based on signal-to-noise principles, while the last one (Model 5) included an independent  
417 and additive diffusion process based on certainty. While each of these models was able to  
418 account for some of the relationships in the data, only Model 4 accounted for all of them. In this  
419 model, the drift rate of the diffusion process is not simply the fluctuating difference in the values  
420 of the options (Tajima, Drugowitsch, & Pouget, 2016), but rather a difference between the ratios  
421 of the values and their corresponding value uncertainties. This mechanism has a normative  
422 flavor, as it penalizes values that are associated with uncertain alternatives. Some similar type of  
423 signal-to-noise models have also been supported by data in perceptual choice tasks. For example,  
424 de Gardelle and Summerfield (2011) examined choices in which an array of eight visual patches  
425 of variable color or shape are compared (in binary choice) to a reference (color or shape). By  
426 independently varying the set mean distance (in the relevant dimension) from the reference as  
427 well as the set variance, they found that both independently affect choice accuracy and RT. In  
428 particular, set variance (which is the analog of our value uncertainty) reduces choice accuracy  
429 and increases RT. As shown by de Gardelle and Summerfield (2011), a signal-to-noise model can  
430 account for this dependency. Indeed, the random dot motion task that is widely used alongside  
431 the DDM in perceptual decision making studies provides a signal-to-noise ratio as input for the  
432 drift rate (e.g., Gold & Shadlen, 2007). With this task, drift rate is typically determined by the  
433 motion coherence, which is composed of the number of dots moving in the same direction  
434 (signal) as well as the number of dots moving randomly (noise).

435           An alternative way to introduce option-specific value uncertainty in the DDM could be to  
436 assume that the uncertainty affects the response boundary rather than the drift rate.  
437 Accordingly, decision makers would compensate for their uncertainty by increasing the response  
438 boundary. While such a model could account for the negative correlation between RT and  
439 certainty (C) shown in Figure 2, it would not be able to account for the negative correlation  
440 between RT and dC. Moreover, such a model would predict that choices become more stochastic  
441 as value certainty increases, which is both counterintuitive and in contrast to the data. As we  
442 show in the Supplementary Materials, this model also fails in term of quantitative model  
443 comparison. Thus, we believe that the way in which value uncertainty affects the decision process

444 is via its impact on the drift rate. Future work is needed to examine the neural mechanism that  
445 extracts the drift rate from fluctuating values (sampled from memory or prospective imagination;  
446 Bakkour et al, 2019; Poldrack et al, 2001; Schacter, Addis, & Buckner, 2007) and that reduces the  
447 drift rate of strongly fluctuating items. Future research is also needed to examine if the effects of  
448 value uncertainty on choice correlate with risk-aversion at the level of individual participants, and  
449 to integrate this type of model with dynamical attentional affects as in the attentional drift-  
450 diffusion model (aDDM; Krajbich et al, 2010; Sepulveda et al, 2020).

451         While we have focused here on how value certainty affects choice and RT, the  
452 experimental data also importantly show a marked and systematic effect of value certainty on  
453 choice confidence. In particular, higher average value certainty ( $C$ ) and certainty difference ( $dC$ )  
454 both lead to higher choice confidence. This pattern raises a further challenge for most  
455 accumulation-to-bound style choice models that aim to account for both RT and choice  
456 confidence. For example, in the balance of evidence (BOE) type models (Vickers & Packer, 1982;  
457 De Martino et al, 2013), confidence corresponds to the difference in the activation of two  
458 accumulators that independently race to a decision boundary. If we were to naively introduce  
459 option-specific noise in such models, they would predict, contrary to the data, that the  
460 confidence becomes larger for options with more value uncertainty (as the noise increases the  
461 BOE; see Lee & Daunizeau, 2020b). Similarly, if we were to model confidence using a DDM with  
462 collapsing boundaries (e.g., Tajima et al, 2016), with confidence corresponding to the height of  
463 the boundary at the time the choice is made, naively introducing option-specific noise would  
464 once again provide us with a prediction opposite from what we see in the data. For uncertain  
465 alternatives, there would be more noise in the evidence accumulation process, resulting in faster  
466 choices and therefore higher boundaries, and thus higher confidence (in fact, this would be true  
467 for any model that assumes that confidence decreases with RT; Kiani & Shadlen, 2009).

468         There are very few value-based choice studies that simultaneously examined value  
469 certainty and choice confidence (but see Lee & Daunizeau, 2020a, 2020b; Lee & Coricelli, 2020;  
470 De Martino et al, 2013). We have not modeled choice confidence here, as there are many  
471 potential ways to do this, with substantial divergence among them (Vickers & Packer, 1982; Kiani  
472 & Shadlen, 2009; Pleskac & Busemeyer, 2010; De Martino et al, 2013; Moran, Teodorescu, &

473 Usher, 2015; Calder-Travis, Bogacz, & Yeung, 2020; see Calder-Travis et al, 2020). Nevertheless,  
474 all of these models strive to predict a strong negative correlation between RT and choice  
475 confidence, as has been demonstrated in a plethora of experimental data. We note that in the  
476 data we examined, the impact of value certainty on choice confidence was essentially the reverse  
477 of its effect on RT (see Supplementary Material, Figure S1). While we did not explore this further,  
478 it suggests that a signal-to-noise DDM can also capture the dependency of choice confidence on  
479 value certainty. Future work is needed to determine how signal detection style DDM variants  
480 might be extended towards an optimal unified account of choice, RT, and choice confidence.

481

#### 482 **Funding**

483 MU was funded by supported by the United States-Israel Binational Science Foundation (CNCRS =  
484 2014612).

485

#### 486 **Acknowledgments**

487 We wish to thank Konstarinos Tsetsos and Giovanni Pezzulo for a critical reading of the  
488 manuscript and for helpful discussions. We thank Ian Krajbich for generously sharing his data  
489 with us. We also thank Antonio Rangel for encouraging support on this project.

490

491

492 **BIBLIOGRAPHY**

- 493 Alós-Ferrer, C. (2018). A Dual-Process Diffusion Model. *Journal of Behavioral Decision Making*,  
494 31(2), 203-218.
- 495 Bakkour, A., Palombo, D. J., Zylberberg, A., Kang, Y. H., Reid, A., Verfaellie, M., ... & Shohamy,  
496 D. (2019). The hippocampus supports deliberation during value-based decisions. *elife*, 8,  
497 e46080.
- 498 Basten, U., Biele, G., Heekeren, H. R., & Fiebach, C. J. (2010). How the brain integrates costs  
499 and benefits during decision making. *Proceedings of the National Academy of Sciences*,  
500 107(50), 21767-21772.
- 501 Boldt, A., & Yeung, N. (2015). Shared neural markers of decision confidence and error  
502 detection. *Journal of Neuroscience*, 35(8), 3478-3484.
- 503 Brown, S. D., & Heathcote, A. (2008). The simplest complete model of choice response time:  
504 Linear ballistic accumulation. *Cognitive psychology*, 57(3), 153-178.
- 505 Busemeyer, J. R., Gluth, S., Rieskamp, J., & Turner, B. M. (2019). Cognitive and neural bases of  
506 multi-attribute, multi-alternative, value-based decisions. *Trends in cognitive sciences*,  
507 23(3), 251-263.
- 508 Calder-Travis, J., Bogacz, R., & Yeung, N. (2020). Bayesian confidence for drift diffusion  
509 observers in dynamic stimuli tasks. *bioRxiv*.
- 510 Calder-Travis, J., Charles, L., Bogacz, R., & Yeung, N. (2020). Bayesian confidence in optimal  
511 decisions. *psyArXiv*.
- 512 Daunizeau, J., Adam, V., & Rigoux, L. (2014). VBA: a probabilistic treatment of nonlinear  
513 models for neurobiological and behavioural data. *PLoS Comput Biol*, 10(1), e1003441.
- 514 De Gardelle, V., & Summerfield, C. (2011). Robust averaging during perceptual judgment.  
515 *Proceedings of the National Academy of Sciences*, 108(32), 13341-13346.

- 516 De Martino, B., Fleming, S. M., Garrett, N., & Dolan, R. J. (2013). Confidence in value-based  
517 choice. *Nature neuroscience*, *16*(1), 105-110.
- 518 Drugowitsch, J., DeAngelis, G. C., Klier, E. M., Angelaki, D. E., & Pouget, A. (2014). Optimal  
519 multisensory decision-making in a reaction-time task. *Elife*, *3*, e03005.
- 520 Fetsch, C. R., Pouget, A., DeAngelis, G. C., & Angelaki, D. E. (2012). Neural correlates of  
521 reliability-based cue weighting during multisensory integration. *Nature neuroscience*,  
522 *15*(1), 146-154.
- 523 Gold, J. I., & Shadlen, M. N. (2007). The neural basis of decision making. *Annual review of*  
524 *neuroscience*, *30*.
- 525 Gwinn, R., & Krajbich, I. (2020). Attitudes and attention. *Journal of Experimental Social*  
526 *Psychology*, *86*, 103892.
- 527 Kiani, R., & Shadlen, M. N. (2009). Representation of confidence associated with a decision by  
528 neurons in the parietal cortex. *science*, *324*(5928), 759-764.
- 529 Krajbich, I., Armel, C., & Rangel, A. (2010). Visual fixations and the computation and  
530 comparison of value in simple choice. *Nature neuroscience*, *13*(10), 1292-1298.
- 531 Lebreton, M., Abitbol, R., Daunizeau, J., & Pessiglione, M. (2015). Automatic integration of  
532 confidence in the brain valuation signal. *Nature neuroscience*, *18*(8), 1159-1167.
- 533 Lee, D., & Coricelli, G. (2020). An empirical test of the role of value certainty in decision  
534 making. *bioRxiv*, 2020.06.16.155234.
- 535 Lee, D., & Daunizeau, J. (2020a). Choosing what we like vs liking what we choose: How choice-  
536 induced preference change might actually be instrumental to decision-making. *PLoS*  
537 *one*, *15*(5), e0231081.
- 538 Lee, D., & Daunizeau, J. (2020b). Trading Mental Effort for Confidence: The Metacognitive  
539 Control of Value-Based Decision-Making. *bioRxiv*, 837054.



- 540 Milosavljevic, M., Malmaud, J., Huth, A., Koch, C., & Rangel, A. (2010). The drift diffusion model  
541 can account for the accuracy and reaction time of value-based choices under high and low  
542 time pressure. *Judgment and Decision Making*, 5(6), 437.
- 543 Moran, R., Teodorescu, A. R., & Usher, M. (2015). Post choice information integration as a  
544 causal determinant of confidence: Novel data and a computational account. *Cognitive*  
545 *psychology*, 78, 99-147.
- 546 Philiastides, M. G., & Ratcliff, R. (2013). Influence of branding on preference-based decision  
547 making. *Psychological science*, 24(7), 1208-1215.
- 548 Pleskac, T. J., & Busemeyer, J. R. (2010). Two-stage dynamic signal detection: a theory of  
549 choice, decision time, and confidence. *Psychological review*, 117(3), 864.
- 550 Polania, R., Woodford, M., & Ruff, C. C. (2019). Efficient coding of subjective value. *Nature*  
551 *neuroscience*, 22(1), 134-142.
- 552 Polanía, R., Moisa, M., Opitz, A., Grueschow, M., & Ruff, C. C. (2015). The precision of value-  
553 based choices depends causally on fronto-parietal phase coupling. *Nature*  
554 *communications*, 6(1), 1-10.
- 555 Poldrack, R. A., Clark, J., Paré-Blagoev, E. A., Shohamy, D., Moyano, J. C., Myers, C., & Gluck,  
556 M. A. (2001). Interactive memory systems in the human brain. *Nature*, 414(6863), 546-550.
- 557 Ratcliff, R., & McKoon, G. (2008). The diffusion decision model: theory and data for two-choice  
558 decision tasks. *Neural computation*, 20(4), 873-922.
- 559 Ratcliff, R., Smith, P. L., Brown, S. D., & McKoon, G. (2016). Diffusion decision model: Current  
560 issues and history. *Trends in cognitive sciences*, 20(4), 260-281.
- 561 Ratcliff, R., Voskuilen, C., & Teodorescu, A. (2018). Modeling 2-alternative forced-choice tasks:  
562 Accounting for both magnitude and difference effects. *Cognitive psychology*, 103, 1-22.
- 563 Schacter, D. L., Addis, D. R., & Buckner, R. L. (2007). Remembering the past to imagine the  
564 future: the prospective brain. *Nature reviews neuroscience*, 8(9), 657-661.

- 565 Sepulveda, P., Usher, M., Davies, N., Benson, A., Ortoleva, P., & De Martino, B. (2020). Visual  
566 attention modulates the integration of goal-relevant evidence and not value. *bioRxiv*.
- 567 Tajima, S., Drugowitsch, J., & Pouget, A. (2016). Optimal policy for value-based decision-  
568 making. *Nature communications*, 7(1), 1-12.
- 569 Teodorescu, A. R., Moran, R., & Usher, M. (2016). Absolutely relative or relatively absolute:  
570 violations of value invariance in human decision making. *Psychonomic bulletin & review*,  
571 23(1), 22-38.
- 572 Usher, M., & McClelland, J. L. (2001). The time course of perceptual choice: the leaky,  
573 competing accumulator model. *Psychological review*, 108(3), 550.
- 574 Vickers, D. (1970). Evidence for an accumulator model of psychophysical discrimination.  
575 *Ergonomics*, 13(1), 37-58.
- 576 Vickers, D., & Packer, J. (1982). Effects of alternating set for speed or accuracy on response  
577 time, accuracy and confidence in a unidimensional discrimination task. *Acta psychologica*,  
578 50(2), 179-197.
- 579

## 580 **Supplementary Materials**

### 581 *Choice Confidence*

582 In this study, we chose not to include choice confidence in our model predictions, as there  
583 is not currently an agreed upon standard for doing so. Nevertheless, we did briefly examine this  
584 variable in those datasets that contained it (Studies 1-3; Lee & Daunizeau, 2020a, 2020b; Lee &  
585 Coricelli, 2020). In general, choice confidence exhibited patterns qualitatively opposite to those  
586 exhibited by RT. Specifically, regression beta weights for dV, C, and dC were of similar magnitude  
587 as those for RT, but were all positive (whereas for RT, they were all negative). (see Figure S1)

588

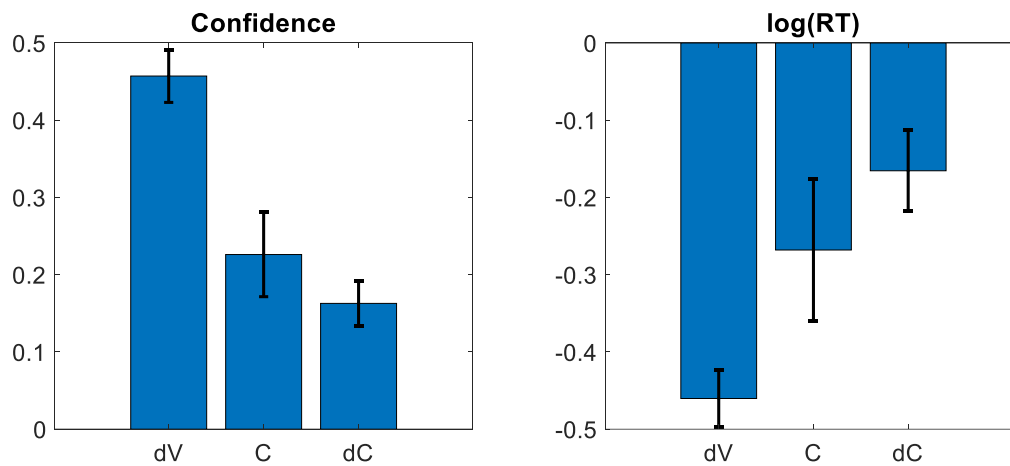

589

590 **Figure S1:** Beta weights from a linear regression of dV, C, and dC on choice confidence (left) and  
591 log(RT) (right; n=124; bar heights represent population means, error bars represent s.e.m.).

### 592 *Certainty-Adjusted Response Threshold*

593 We considered a model that was a standard DDM, but with the response threshold  
594 determined as a function of option-specific (or more accurately, trial-specific) value certainty.  
595 Under this model, the height of the threshold increases as the value certainty of the pair of  
596 options decreases, on a trial-by-trial basis. Choice probability and mean RT are thus calculated  
597 using the following equations:

598 
$$p(ch = 1) = \frac{1}{1 + e^{\left(\frac{-2\theta(\sigma_1^2 + \sigma_2^2)d}{\sigma^2}(\mu_1 - \mu_2)\right)}}$$

599 
$$RT = \frac{\theta(\sigma_1^2 + \sigma_2^2)(2 * p(ch = 1) - 1)}{d(\mu_1 - \mu_2)}$$

600 As can be seen in the equations, increasing value uncertainty will result in higher choice  
601 consistency and higher RT. This is inconsistent with the experimental data. Furthermore, as  
602 expected, this model received no support when included in a quantitative comparison with the  
603 other models.
